# Supplementary material for: Understanding functional miRNA–target interactions in vivo by site-specific genome engineering
Source: PubMed Central journal article supplement (PMC4143950; doi:10.1038/ncomms5640), 2014-08-19
Supplement: ncomms5640-s1.pdf [file ncomms5640-s1.pdf]

**a**

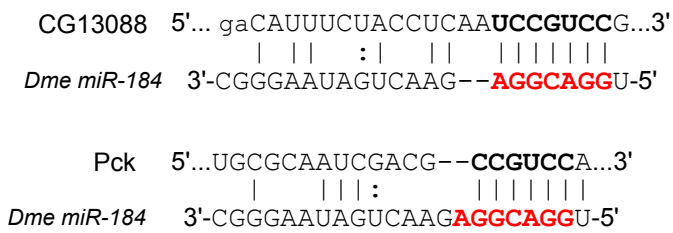

**b**

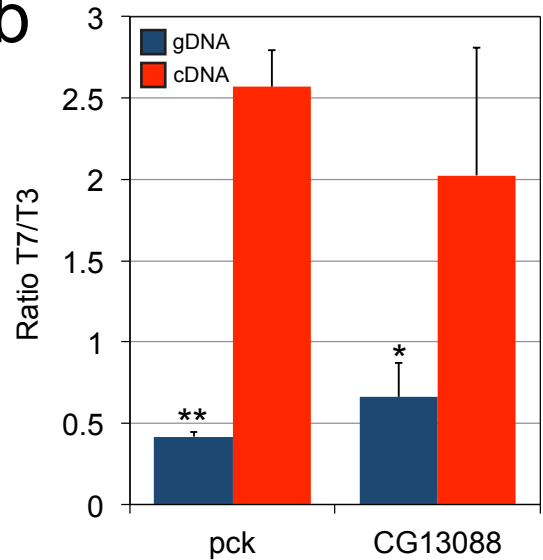

**Supplementary Figure 1: Analysis of MRE activity in *Drosophila* S2R+ cells in culture.**

**(a)** Two predicted targets of miR-184, PCK and CG13088 were tested in this system. Sequences deleted by HDR are shown in bold; the miR-184 seed sequence is in red. **(b)** The ratio of T7 signal to T3 signal is displayed on the y-axis, and results from gDNA are shown in blue and cDNA in red. Both transcripts appear to be upregulated upon MRE deletion in this cell type ( $p < 0.05$ , one-tailed T-test,  $n = 3$ ).

|        | WT              |      | T7 MRE <sup>mut</sup> |      | T3 MRE <sup>WT</sup> |      |
|--------|-----------------|------|-----------------------|------|----------------------|------|
|        | microRNA        | Seed | microRNA              | Seed | microRNA             | Seed |
| PCMTD1 | hsa-miR-92b     | 8mer | hsa-miR-513a-3p       | 8mer | hsa-miR-92b          | 8mer |
|        | hsa-miR-92a     | 8mer | hsa-miR-1290          | 8mer | hsa-miR-92a          | 8mer |
|        | hsa-miR-513a-3p | 8mer | hsa-miR-944           | 7mer | hsa-miR-513a-3p      | 8mer |
|        | hsa-miR-367     | 8mer | hsa-miR-643           | 7mer | hsa-miR-367          | 8mer |
|        | hsa-miR-25      | 8mer | hsa-miR-921           | 7mer | hsa-miR-25           | 8mer |
|        | hsa-miR-1290    | 8mer |                       |      | hsa-miR-1290         | 8mer |
|        | hsa-miR-944     | 7mer |                       |      | hsa-miR-944          | 7mer |
|        | hsa-miR-643     | 7mer |                       |      | hsa-miR-643          | 7mer |
|        | hsa-miR-363     | 7mer |                       |      | hsa-miR-363          | 7mer |
|        | hsa-miR-32      | 7mer |                       |      | hsa-miR-32           | 7mer |
|        |                 |      |                       |      | hsa-miR-944          | 8mer |
|        |                 |      |                       |      | hsa-miR-921          | 8mer |
| C9orf7 | hsa-miR-596     | 8mer | hsa-miR-596           | 8mer | hsa-miR-596          | 8mer |
|        | hsa-miR-1226    | 8mer | hsa-miR-1226          | 8mer | hsa-miR-1226         | 8mer |
|        | hsa-miR-483-3p  | 7mer | hsa-miR-483-3p        | 7mer | hsa-miR-483-3p       | 7mer |
|        |                 |      | hsa-miR-921           | 7mer | hsa-miR-921          | 8mer |
|        |                 |      |                       |      | hsa-miR-211          | 7mer |
|        |                 |      |                       |      | hsa-miR-204          | 7mer |
| MAPRE1 | hsa-miR-548l    | 8mer | hsa-miR-548l          | 8mer | hsa-miR-548l         | 8mer |
|        | hsa-miR-211     | 8mer | hsa-miR-211           | 8mer | hsa-miR-211          | 8mer |
|        | hsa-miR-204     | 8mer | hsa-miR-204           | 8mer | hsa-miR-204          | 8mer |
|        | hsa-miR-922     | 7mer | hsa-miR-922           | 7mer | hsa-miR-922          | 7mer |
|        | hsa-miR-570     | 7mer | hsa-miR-570           | 7mer | hsa-miR-570          | 7mer |
|        |                 |      | hsa-miR-921           | 7mer | hsa-miR-921          | 8mer |
|        |                 |      |                       |      | hsa-miR-211          | 7mer |
|        |                 |      |                       |      | hsa-miR-204          | 7mer |

**Supplementary Table 1: Comparative miRNA target predictions before and after T7 or T3 barcode integration.** MRE prediction was performed using the PITA algorithm for WT sequences and insertions of the T7 MRE<sup>mut</sup> and T3 MRE<sup>WT</sup> HDR oligonucleotides. For T7 and T3 integrant sequences, MREs added to the WT sequence are highlighted in grey. The miR-944 MRE differentially generated by the T3 MRE<sup>WT</sup> in PCMTD1 is unlikely to be functional since miR-944 is not expressed to any degree in HEK-293 cells.
